# Supplementary material for: Risk assessment of butyltins based on a fugacity-based food web bioaccumulation model in the Jincheng Bay mariculture area: I. model development
Source: Royal Society of Chemistry journal article supplement (doi:10.1039/c4em00219a), 2014-01-01
Supplement: c4em00219a1.pdf [file c4em00219a1.pdf]

## Supplementary Information

### Box S1 Procedure of fugacity-based food web bioaccumulation model

```
function [Cf BCF BAF f Dm FLXup FLXlt] = Food web(DieMat,BioProp,ChemConc,IgKow,DIR,fIR,MR)
% Return to biological concentrations (Cf, ng/g), fugacities (f), bioconcentration
% factors (BCF), bioaccumulation factors (BAF), biotransformation D-values (Dm)
% for an individual chemical in the aquatic compartment based on the fugacity-based
% food web models. Additionally, the chemical fluxes for the food web will be
% also optionally returned, including the uptake flux (FLXup) and loss flux (FLXlt),
% and the former includes the flux via respiration, diet and the biodegradation
% via respective maternal chemical, while the latter via respiration, egestion,
% biotransformation, and growth dilution, repectively.
% For more information pertaining to this program or any others in this paper,
% please contact with the corresponding author via rusg@ouc.edu.cn

error(nargchk(4,7,nargin))
if nargin==5
    error('The argument of "fIR" are required when "DIR" was inputted ');
end
if nargin==6
    MR = 1;
end

ln2 = log(2);
%---(1)----- Reading parameters
Vfp = ChemConc(2,2); %% Lipid volume fraction of SS (V/V,m/m)
Vfs = ChemConc(3,2); %% Lipid volume fraction of sediment solids (V/V,m/m)
Dnp = ChemConc(2,3); %% Solids density of SS (kg/m3)
Dns = ChemConc(3,3); %% Solids density of sediment (kg/m3)
TOCp = ChemConc(2,4); %% Total organic carbon in suspended particles (g/g,dwt)
TOCs = ChemConc(3,4); %% Total organic carbon in sediment solids (g/g,dwt)
Cwb = ChemConc(1,5); %% Chemical concentration in bulk water (ng/L)
Cs = ChemConc(3,5); %% Chemical concentration in sediment solids (ng/g,dwt)

V = BioProp(:,1); %% Organism volume (cm3)
L = BioProp(:,2); %% Lipid volume fraction (V/V)
HL = BioProp(:,3); %% Chemical Biotransformation/metabolic half-life (d)
GR = BioProp(:,4); %% Growth rate (1/d)
Fd = BioProp(:,5); %% Feeding rate (1/d)
X = BioProp(:,[6 7]); %% Fractional respiration from overlying water and porewater
Aw = BioProp(:,8); %% Gut absorption efficiency for water
Ao = BioProp(:,9); %% Gut absorption efficiency for lipid
clear ChemProp ChemConc BioProp

%%---(2)----Calculate Z-values for Type 1 chemicals
Kow = 10^IgKow; %% Calculation of the octanol/water partition coefficient
```

$K_{oc} = 0.41 * K_{ow}$  ; %% Calculation of the organic carbon water partition coefficient

$Z_w = 1$  ; %% Calculation of the Z-value for water

$Z_o = Z_w * K_{ow}$ ; %% Calculation of the Z-value for octanol

$Z_p = Z_w * TOC_p * K_{oc} * D_{np}/1000$ ; %% Z-value for particles in the water column

$Z_s = Z_w * TOC_s * K_{oc} * D_{ns}/1000$ ; %% Z-value for solid sediment particles

$Z_{wb} = Z_w * (1 - V_{fp}) + V_{fp} * Z_p$ ; %% Bulk Z-value for water

$Z_{sb} = Z_w * (1 - V_{fs}) + V_{fs} * Z_s$ ; %% Bulk Z-value for the sediment

%%----(3)---Calculate the concentration and fugacity in water and sediment

$C_{wb} = C_{wb} / 1E+6$ ; %% Chemical concentration in the water column (g/m3)

$f_w = C_{wb} / Z_{wb}$ ; %% Fugacity of the chemical in water (g/m3)

$C_w = f_w * Z_w$ ; %% Dissolved concentration of the chemical in water (g/m3)

$C_s = (C_s * D_{ns}) / 1E+6$ ; %% Concentration in sediment solid particles (g/m3)

$f_s = C_s / Z_s$ ; %% Sediment fugacity

%%----(4)---Calculate biological parameters for the food web

$V = V / 1E+6$ ; %% Organism volume (m3)

$HL = HL * 24$ ; %% Organism Biotransformation half-life (h)

$k_m = \ln 2 / HL$ ; %% Organism Biotransformation rate constant (1/h)

$GR = GR / 24$ ; %% Growth rate constant (1/h)

$G_a = F_d * V / 24$ ; %% Food intake rate (m3)

$Q_w = 88.3 * (V * 1000)^{0.6}$ ; %% Water transport parameter

$Q_L = 0.001 * Q_w$ ; %% Lipid transport parameter

$k_{1D} = 1 / ((V * 1000 / Q_w) + (V * 1000 / Q_L) / K_{ow})$ ; %% The water uptake rate constant (1/d)

$k_1 = k_{1D} / 24$ ; %% Water uptake rate constant (1/h)

$Z_f = Z_w * K_{ow} * L$ ; %% Z-value for the organism

$BCF = Z_f / Z_w$ ; %% Equilibrium bioconcentration factor (BCF)

%%----(5)---Calculate D-values

$D_w = V * Z_w * k_1$ ; %% Gill D-value

$D_m = V * Z_f * k_m$ ; %% Biotransformation D-value

$D_g = V * Z_f * GR$ ; %% Growth D-value

$E_a = (A_w * K_{ow} + A_o)^{-1}$ ; %% Gut chemical absorbance efficiency

$D_a = \text{diag}(E_a) * \text{diag}(G_a) * \text{DieMat} * \text{diag}(L) * Z_o$ ; %% Net uptake D-value i.e. including efficiency

$D_{at} = \text{sum}(D_a, 2)$ ; %% D-value for the total gross uptake from all species

$Q = 3$ ; %% Digestion Factor

$D_e = D_{at} / Q$ ; %% Loss by egestion

$D_t = D_w + D_m + D_g + D_e$ ; %% Total Output

%%----(6)---Calculate food web fugacity, concentration, and acute BCF value

$W = D_w / D_t$ ; %% Fugacity Multiplier for water and porewater respiration

$A = \text{eye}(\text{length}(V)) - \text{diag}(D_t) \backslash D_a$ ; %% Feeding matrix

$E = W * (X * [f_w \ f_s])$ ; %% Exposure via respiration

if nargin >= 6

ER = MR \* DIR / Dt \* fIR; %% Exposure via the biodegradation of other chemical

E = E + ER; %% Multiple total exposure

```

end
f = inv(A)*E;          %% Food web fugacity
Cf = f.* Zf;          %% Fish concentration (g/m3)
Cf = 1000 * Cf;       %% Fish concentration (ng/g)
BAF = Cf./((Cw*X*[1 fs/fw])/1000); %% Bioaccumulate factor, donation from both water column and porewater are
taken in consideration

%%----(7)----Calculate the flux in the food web
if nargin>5
    fa = zeros(length(Dat),1); %% Total prey fugacities
    n = find(~~Dat);          %% Get the list numbers of the preys in the food web
    fa(n) = Da(n,:).*f./Dat(n);
    Uw = X*[fw fs]'.*Dw;     %% Uptake flux by respiration (g/h)
    Ua = fa.* Dat;          %% Uptake flux from food
    FLXup = [Uw Ua];
    if nargin>=6
        Ur = DIR.*fIR*MR; %% Uptake flux by the biodegradation of other chemical
        FLXup = [FLXup Ur];
    end
    FLXlt = f*ones(1,4).*[Dw De Dm Dg]; %% Flux lost by respiration, egestion, biotransformation, and growth
dilution
end

```

**Box S2** The procedure to compute the Standard Regression Coefficients (SRC)

```

function [SRC H P Stat] = Parregress(X, Y, testway, alf)
% Partial regression for variable Y matching a multiple-independent-variable matrix of X. This function return to the
% standard regression coefficients (SRC) with concerned significant test parameters of H, P, and F/t-value based on a
% F-test or t-test. The test approach should be stated by assigning the parameter of 'testway' with an 'F' for F-test or 't'
% for t-test, and then the parameter of Stat stands for F-value or t-value respectively. If it's not assigned, F-test would
% be performed as a default value. X must be a 2-D array with each row standing for an independent-variable vector
% while Y should be a row vector.

if nargin==2||nargin==3
    alf = 0.05;
end
if nargin==2
    testway = 'F';
end
[b R2 H P F SS MS] = Lineregress(X, Y, alf);
clear R2 H P F SS
b(1) = [];
MSe = MS(2);
SRC = b.*std(X)/std(Y); %% Partial coefficient

```

```

[n k] = size(X);
if testway=='F'; %% F-test for partial coefficient
    SSr = SubSSr(X,Y);
    for i = 1:k
        x = X;
        x(:,i) = [];
        ssr(i) = SubSSr(x,Y);
    end
    SSP = SSr - ssr;
    F = SSP/MSe;
    P = fcdf(F,k-1,n-k-1);
    P = min(P,1-P);
    H = P<alf/2;
    Stat = F;
elseif testway=='t'; %% t-test for partial coefficient
    X = [ones(n,1) X];
    SE = sqrt(MSe*diag(inv(X'*X)));
    SE(1) = [];
    t = b./SE;
    P = tcdf(t,n-k-1);
    P = min(P,1-P);
    H = P<alf/2;
    Stat = t;
end

%%%%%%%%%%%%%%%%%%%%%%%%%%%%%%%%%%%%%%%%%%%%%%%%%%%%%%%%%%%%%%%%%%%%%%%%

function SSr = SubSSr(X,Y)
% Subfunction for SSr calculation
b = Lineregress(X,Y);
b(1) = [];
Sy = (X'*Y)' - sum(X)*mean(Y);
SSr = b*Sy';

%%%%%%%%%%%%%%%%%%%%%%%%%%%%%%%%%%%%%%%%%%%%%%%%%%%%%%%%%%%%%%%%%%%%%%%%

function [B R2 H P F SS MS] = Lineregress(X, Y, alf)
% Subfunction for multiple liner regulation in the form of  $Y = X \cdot \beta + \epsilon$ 
% and ANOVA of b based on F-test
% X must be a 2-D array with each row for different independent vectors, as follows:
% X = [1 X] = [1 X1 X2 ...Xn]
% Y and E(b') =  $\beta$  should be row vectors, as follows:
% Y = [y1; y2; ...; yn]
% B = [ a b1 b2 ... bn]

```

```

%----Parameters checking
if det(X*X)==0
    error('Bad values of X, Please Check whether if a column of X with all the values of Zero')
end
%----Lineregress
[n k] = size(X);
X = [ones(n,1) X];
B = (X'*X)\(X'*Y);
B = B';

%----ANOVA of the regression coefficient b based on F-test
if nargin==2
    alf = 0.05;
end
b = B(2:end);
X(:,1) = [];
Sy = (X'*Y)' - sum(X)*mean(Y);
SSr = b*Sy';
V1 = k;
V2 = n - k - 1;
Syy = (Y'-mean(Y))*(Y-mean(Y));
SSe = Syy - SSr;
SSt = SSr + SSe;
R2 = SSr/SSt;
MSr = SSr/V1;
MSe = SSe/V2;
F = MSr/MSe;
P = fcdf(F,V1,V2);
P = min(P,1-P);
H = P<alf;
SS = [SSr; SSe; SSt];
MS = [MSr; MSe];

```
